# Supplementary material for: Regional development potentials of Industry 4.0: Open data indicators of the Industry 4.0+ model
Source: PLoS One. 2021 Apr 19;16(4):e0250247. doi: 10.1371/journal.pone.0250247 (PMC8055029; doi:10.1371/journal.pone.0250247)
Supplement: S3 Appendix — This file provides the description of variables and all the supporting data is available in the following repository link: http://dx.doi.org/10.17632/23gwn43ygp.1. (XLSX) [file pone.0250247.s003.xlsx]

## Sheet: Munka1
Data describing the regional Industry 4.0 readiness index
All supporting data are available in the following repository link:
http://dx.doi.org/10.17632/23gwn43ygp.1
Shortened name	Total name	Description
POP	demo_r_d2jan_UNIT_NR__SEX_T__AGE_TOTAL	Population on 1 January by age, sex and NUTS 2 region.
EDU1	edat_lfse_04_SEX_T__ISCED11_ED0-2__AGE_Y25-64__UNIT_PC	Percentage of the population aged 25-64 with less than primary or lower secondary education in the NUTS 2 regions.
EDU2	edat_lfse_04_SEX_T__ISCED11_ED3-8__AGE_Y25-64__UNIT_PC	Percentage of the population aged 25-64 upper secondary, post-secondary non-tertiary and tertiary education in the region.
EDU3	edat_lfse_04_SEX_T__ISCED11_ED3_4__AGE_Y25-64__UNIT_PC	Percentage of the population aged 25-64 upper secondary and post-secondary non-tertiary education in the region.
EDU4	edat_lfse_04_SEX_T__ISCED11_ED5-8__AGE_Y25-64__UNIT_PC	Percentage of the population aged 25-64 with tertiary education in the region.
EDU5	edat_lfse_12_SEX_T__ISCED11_ED3-8__AGE_Y30-34__UNIT_PC	Percentage of the population aged 30-34 with upper secondary, post-secondary non-tertiary and tertiary education.
EDU6	edat_lfse_12_SEX_T__ISCED11_ED3_4__AGE_Y30-34__UNIT_PC	Percentage of the population aged 30-34 with upper secondary and post-secondary non-tertiary education.
EDU7	edat_lfse_12_SEX_T__ISCED11_ED5-8__AGE_Y30-34__UNIT_PC	Percentage of the population aged 30-34 with tertiary education
EMP1	edat_lfse_33_UNIT_PC__SEX_T__ISCED11_ED0-2__DURATION_TOTAL__AGE_Y15-34	Total employment rates of young people not in education and training, from less than primary education till post-secondary non-tertiary education, for young people aged between 15-34 years.
EMP2	edat_lfse_33_UNIT_PC__SEX_T__ISCED11_ED0-2__DURATION_Y1-3__AGE_Y15-34	Employment rates of young people not in education and training, with less than primary and lower secondary education, one to three years since completion of the highest level of education, for young people aged between 15-34 years.
EMP3	edat_lfse_33_UNIT_PC__SEX_T__ISCED11_ED0-2__DURATION_Y_GT3__AGE_Y15-34	Employment rates of young people not in education and training, with less than primary and lower secondary education, three years since completion of the highest level of education, for young people aged between 15-34 years.
EMP4	edat_lfse_33_UNIT_PC__SEX_T__ISCED11_ED0-2__DURATION_Y_GT5__AGE_Y15-34	Employment rates of young people not in education and training, with less than primary and lower secondary education, with more than five years since completion of the highest level of education, for young people aged between 15-34 years.
EMP5	edat_lfse_33_UNIT_PC__SEX_T__ISCED11_ED0-2__DURATION_Y_LE3__AGE_Y15-34	Employment rates of young people not in education and training, with less than primary and lower secondary education, less than three years since completion of the highest level of education, for young people aged between 15-34 years.
EMP6	edat_lfse_33_UNIT_PC__SEX_T__ISCED11_ED0-2__DURATION_Y_LE5__AGE_Y15-34	Employment rates of young people not in education and training, with less than primary and lower secondary education, less than five years since completion of the highest level of education, for young people aged between 15-34 years.
EMP7	edat_lfse_33_UNIT_PC__SEX_T__ISCED11_ED0-4__DURATION_TOTAL__AGE_Y15-34	Employment rates of young people not in education and training, with non-tertiary education, for young people aged between 15-34 years.
EMP8	edat_lfse_33_UNIT_PC__SEX_T__ISCED11_ED0-4__DURATION_Y1-3__AGE_Y15-34	Employment rates of young people not in education and training, with non-tertiary educations, from one to three years since completion of the highest level of education, for young people aged between 15-34 years.
EMP9	edat_lfse_33_UNIT_PC__SEX_T__ISCED11_ED0-4__DURATION_Y_GT3__AGE_Y15-34	Employment rates of young people not in education and training, with non-tertiary educations, more than three years since completion of the highest level of education, for young people aged between 15-34 years.
EMP10	edat_lfse_33_UNIT_PC__SEX_T__ISCED11_ED0-4__DURATION_Y_GT5__AGE_Y15-34	Employment rates of young people not in education and training, with non-tertiary educations, more than five years since completion of the highest level of education, for young people aged between 15-34 years.
EMP11	edat_lfse_33_UNIT_PC__SEX_T__ISCED11_ED0-4__DURATION_Y_LE3__AGE_Y15-34	Employment rates of young people not in education and training, with non-tertiary educations, less than three years since completion of the highest level of education, for young people aged between 15-34 years.
EMP12	edat_lfse_33_UNIT_PC__SEX_T__ISCED11_ED0-4__DURATION_Y_LE5__AGE_Y15-34	Employment rates of young people not in education and training, with non-tertiary educations, less than five years since completion of the highest level of education, for young people aged between 15-34 years.
EMP13	edat_lfse_33_UNIT_PC__SEX_T__ISCED11_ED3-8__DURATION_TOTAL__AGE_Y15-34	Employment rates of young people not in education and training, with non-tertiary educations, for young people aged between 15-34 years.
EMP14	edat_lfse_33_UNIT_PC__SEX_T__ISCED11_ED3-8__DURATION_Y1-3__AGE_Y15-34	Employment rates of young people not in education and training, with upper secondary, post-secondary, till tertiary education, one to three years since completion of the highest level of education, for young people aged between 15-34 years.
EMP15	edat_lfse_33_UNIT_PC__SEX_T__ISCED11_ED3-8__DURATION_Y_GT3__AGE_Y15-34	Employment rates of young people not in education and training, with upper secondary, post-secondary, till tertiary education, more three years since completion of the highest level of education, for young people aged between 15-34 years.
EMP16	edat_lfse_33_UNIT_PC__SEX_T__ISCED11_ED3-8__DURATION_Y_GT5__AGE_Y15-34	Employment rates of young people not in education and training, with upper secondary, post-secondary, till tertiary education, greater than years since completion of the highest level of education, for young people aged between 15-34 years.
EMP17	edat_lfse_33_UNIT_PC__SEX_T__ISCED11_ED3-8__DURATION_Y_LE3__AGE_Y15-34	Employment rates of young people not in education and training, with upper secondary, post-secondary, till tertiary education, less than three years since completion of the highest level of education, for young people aged between 15-34 years.
EMP18	edat_lfse_33_UNIT_PC__SEX_T__ISCED11_ED3-8__DURATION_Y_LE5__AGE_Y15-34	Employment rates of young people not in education and training, with upper secondary, post-secondary, till tertiary education, less than five years since completion of the highest level of education, for young people aged between 15-34 years.
EMP19	edat_lfse_33_UNIT_PC__SEX_T__ISCED11_ED3_4__DURATION_TOTAL__AGE_Y15-34	Employment rates of young people not in education and training, upper secondary till non-tertiary education, for young people aged between 15-34 years.
EMP20	edat_lfse_33_UNIT_PC__SEX_T__ISCED11_ED3_4__DURATION_Y1-3__AGE_Y15-34	Employment rates of young people not in education and training, upper secondary till non-tertiary education, on to three years since completion of the highest level of education, for young people aged between 15-34 years.
EMP21	edat_lfse_33_UNIT_PC__SEX_T__ISCED11_ED3_4__DURATION_Y_GT3__AGE_Y15-34	Employment rates of young people not in education and training, upper secondary till non-tertiary education, more than three years since completion of the highest level of education, for young people aged between 15-34 years.
EMP22	edat_lfse_33_UNIT_PC__SEX_T__ISCED11_ED3_4__DURATION_Y_GT5__AGE_Y15-34	Employment rates of young people not in education and training, upper secondary till non-tertiary education, greater than five years since completion of the highest level of education, for young people aged between 15-34 years.
EMP23	edat_lfse_33_UNIT_PC__SEX_T__ISCED11_ED3_4__DURATION_Y_LE3__AGE_Y15-34	Employment rates of young people not in education and training, upper secondary till non-tertiary education, less than three years since completion of the highest level of education, for young people aged between 15-34 years.
EMP24	edat_lfse_33_UNIT_PC__SEX_T__ISCED11_ED3_4__DURATION_Y_LE5__AGE_Y15-34	Employment rates of young people not in education and training, upper secondary till non-tertiary education, less than five years since completion of the highest level of education, for young people aged between 15-34 years.
EMP25	edat_lfse_33_UNIT_PC__SEX_T__ISCED11_ED5-8__DURATION_Y1-3__AGE_Y15-34	Employment rates of young people not in education and training, with tertiary education, one to three years since completion of the highest level of education, for young people aged between 15-34 years.
EMP26	edat_lfse_33_UNIT_PC__SEX_T__ISCED11_ED5-8__DURATION_Y_GT3__AGE_Y15-34	Employment rates of young people not in education and training, with tertiary education, more than three years since completion of the highest level of education, for young people aged between 15-34 years.
EMP27	edat_lfse_33_UNIT_PC__SEX_T__ISCED11_ED5-8__DURATION_Y_GT5__AGE_Y15-34	Employment rates of young people not in education and training, with tertiary education, more than five years since completion of the highest level of education, for young people aged between 15-34 years.
EMP28	edat_lfse_33_UNIT_PC__SEX_T__ISCED11_ED5-8__DURATION_Y_LE3__AGE_Y15-34	Employment rates of young people not in education and training, with tertiary education, less than three years since completion of the highest level of education, for young people aged between 15-34 years.
EMP29	edat_lfse_33_UNIT_PC__SEX_T__ISCED11_ED5-8__DURATION_Y_LE5__AGE_Y15-34	Employment rates of young people not in education and training, with tertiary education, less than five years since completion of the highest level of education, for young people aged between 15-34 years.
EMP30	edat_lfse_33_UNIT_PC__SEX_T__ISCED11_TOTAL__DURATION_TOTAL__AGE_Y15-34	General employment rates of young people not in education and training, aged between 15-34 years.
EMP31	edat_lfse_33_UNIT_PC__SEX_T__ISCED11_TOTAL__DURATION_Y1-3__AGE_Y15-34	General employment rates of young people not in education and training, since one to three years, aged between 15-34 years.
EMP32	edat_lfse_33_UNIT_PC__SEX_T__ISCED11_TOTAL__DURATION_Y_GT3__AGE_Y15-34	General employment rates of young people not in education and training, since more than three years, aged between 15-34 years.
EMP33	edat_lfse_33_UNIT_PC__SEX_T__ISCED11_TOTAL__DURATION_Y_GT5__AGE_Y15-34	General employment rates of young people not in education and training, since more than five years, aged between 15-34 years.
EMP34	edat_lfse_33_UNIT_PC__SEX_T__ISCED11_TOTAL__DURATION_Y_LE3__AGE_Y15-34	Employment rates of young people not in education and training, educational less than three years since completion of the highest level of education, for young people aged between 15-34 years.
EMP35	edat_lfse_33_UNIT_PC__SEX_T__ISCED11_TOTAL__DURATION_Y_LE5__AGE_Y15-34	Employment rates of young people not in education and training, educational, less than five years since completion of the highest level of education, for young people aged between 15-34 years.
ERA1	ERASMUS_FROM_COUNT	Count of the students in the Erasmus program in the year, where the selected region is the source region.
ERA2	ERASMUS_TO_COUNT	Count of the students in the Erasmus program, who selected the region as destination.
GRA1	Graduates_at_ISCED_6_-_Natural_sciences_mathematics_and_statistics	Number of graduates in natural sciences mathematics and statistics.
GRA2	Graduates_at_ISCED_6_-_Information_and_Communication_Technologies	Number of graduates in information and communication technologies.
GRA3	Graduates_at_ISCED_6_-_Engineering_manufacturing_and_construction	Number of graduates in engineering manufacturing and construction.
HRS1	hrst_st_rcat_CATEGORY_HRSTC__UNIT_PC_POP	Persons with tertiary education and employed in science and technology in percentage to total population.
HRS2	hrst_st_rcat_CATEGORY_HRSTC__UNIT_THS	Persons with tertiary education and employed in science and technology in thousands.
HRS3	hrst_st_rcat_CATEGORY_HRSTE__UNIT_PC_POP	Persons with tertiary education in percentage to total population.
HRS4	hrst_st_rcat_CATEGORY_HRSTE__UNIT_THS	Persons with tertiary education in thousands.
HRS5	hrst_st_rcat_CATEGORY_HRSTO__UNIT_PC_POP	Persons employed in science and technology in percentage to total population.
HRS6	hrst_st_rcat_CATEGORY_HRSTO__UNIT_THS	Persons employed in science and technology in thousands.
HRS7	hrst_st_rcat_CATEGORY_HRST__UNIT_PC_POP	Persons with tertiary education and/or employed in science and technology in percentage to total population.
HRS8	hrst_st_rcat_CATEGORY_HRST__UNIT_THS	Persons with tertiary education and/or employed in science and technology in thousands.
HRS9	hrst_st_rcat_CATEGORY_SE__UNIT_PC_POP	Scientists and engineers in percentage to total population.
HRS10	hrst_st_rcat_CATEGORY_SE__UNIT_THS	Scientists and engineers in thousands.
HTE1	htec_emp_reg2_NACE_R2_C_HTC_MH__UNIT_PC_EMP__SEX_T	Employment in high and medium high-technology manufacturing, in percentage to the total employment.
HTE2	htec_emp_reg2_NACE_R2_C_HTC__UNIT_PC_EMP__SEX_T	Employment in high-technology manufacturing, in percentage to the total employment.
HTE3	htec_emp_reg2_NACE_R2_C_LTC_M__UNIT_PC_EMP__SEX_T	Employment in medium low-technology manufacturing, in percentage to the total employment.
HTE4	htec_emp_reg2_NACE_R2_HTC__UNIT_PC_EMP__SEX_T	Employment in High-technology sectors (high-technology manufacturing and knowledge-intensive high-technology services) , in percentage to the total employment.
HTE5	htec_emp_reg2_NACE_R2_KIS_HTC__UNIT_PC_EMP__SEX_T	Employment in knowledge-intensive high-technology services, ) , in percentage to the total employment.
HTE6	htec_emp_reg2_NACE_R2_KIS__UNIT_PC_EMP__SEX_T	Employment in knowledge-intensive sectors, in percentage to the total employment.
HTE7	htec_emp_reg2_NACE_R2_M__UNIT_PC_EMP__SEX_T	Employment in professional, scientific and technical activities, in percentage to the total employment.
HTE8	htec_emp_reg2_NACE_R2_P__UNIT_PC_EMP__SEX_T	Employment in education, in percentage to the total employment.
PAP	I40Papers	Number of Industry 4.0 related studies published in the year.
PAT	I40_patent_count	Number of Industry 4.0 related patents in the year.
RDE1	rd_e_gerdreg_SECTPERF_BES__UNIT_PC_GDP	Intramural R&D expenditure, in business enterprise sector, normalized as percentage of gross domestic product (GDP).
RDE2	rd_e_gerdreg_SECTPERF_GOV__UNIT_PC_GDP	Intramural R&D expenditure, in governmental sector, normalized as percentage of gross domestic product (GDP).
RDE3	rd_e_gerdreg_SECTPERF_HES__UNIT_PC_GDP	Intramural R&D expenditure, in higher education sector, normalized as percentage of gross domestic product (GDP).
RDE4	rd_e_gerdreg_SECTPERF_PNP__UNIT_PC_GDP	Intramural R&D expenditure, in private non-profit sector, normalized as percentage of gross domestic product (GDP).
RDE5	rd_e_gerdreg_SECTPERF_TOTAL__UNIT_PC_GDP	Total Intramural R&D expenditure, normalized as percentage of gross domestic product (GDP).
RDP1	rd_p_persreg_PROF_POS_TOTAL__SEX_T__SECTPERF_BES__UNIT_FTE	Total R&D personnel and researchers in business enterprise sector in percentage to total employment numerator in full time equivalent of the active population.
RDP2	rd_p_persreg_PROF_POS_TOTAL__SEX_T__SECTPERF_BES__UNIT_HC	Headcount of total R&D personnel and researchers in business enterprise sector.
RDP3	rd_p_persreg_PROF_POS_TOTAL__SEX_T__SECTPERF_BES__UNIT_PC_EMP_FTE	Total R&D personnel and researchers in business enterprise sector in percentage to total employment numerator in full time equivalent, of total employment.
RDP4	rd_p_persreg_PROF_POS_TOTAL__SEX_T__SECTPERF_GOV__UNIT_FTE	Total R&D personnel and researchers in the government, in percentage to total employment numerator in full time equivalent of the active population.
RDP5	rd_p_persreg_PROF_POS_TOTAL__SEX_T__SECTPERF_GOV__UNIT_HC	Headcount of R&D personnel and researchers in the government.
RDP6	rd_p_persreg_PROF_POS_TOTAL__SEX_T__SECTPERF_GOV__UNIT_PC_EMP_FTE	Total R&D personnel and researchers in the government, in percentage to total employment numerator in full time equivalent, of total employment.
RDP7	rd_p_persreg_PROF_POS_TOTAL__SEX_T__SECTPERF_HES__UNIT_FTE	Total R&D personnel and researchers in the higher education, in percentage to total employment numerator in full time equivalent of the active population.
RDP8	rd_p_persreg_PROF_POS_TOTAL__SEX_T__SECTPERF_HES__UNIT_HC	Headcount of R&D personnel and researchers in the higher education.
RDP9	rd_p_persreg_PROF_POS_TOTAL__SEX_T__SECTPERF_HES__UNIT_PC_EMP_FTE	Total R&D personnel and researchers in the higher education, in percentage to total employment numerator in full time equivalent, of total employment.
RDP10	rd_p_persreg_PROF_POS_TOTAL__SEX_T__SECTPERF_PNP__UNIT_FTE	Total R&D personnel and researchers in the private non-profit sector, given in percentage to total employment numerator in full time equivalent of the active population.
RDP11	rd_p_persreg_PROF_POS_TOTAL__SEX_T__SECTPERF_PNP__UNIT_HC	Headcount of the R&D personnel and researchers in the private non-profit sector
RDP12	rd_p_persreg_PROF_POS_TOTAL__SEX_T__SECTPERF_PNP__UNIT_PC_EMP_FTE	Total R&D personnel in private non-profit sector, normalized with the full time equivalents.
RDP13	rd_p_persreg_PROF_POS_TOTAL__SEX_T__SECTPERF_TOTAL__UNIT_FTE	Total R&D personnel and researchers in percentage to total employment numerator in full time equivalent of the active population.
RDP14	rd_p_persreg_PROF_POS_TOTAL__SEX_T__SECTPERF_TOTAL__UNIT_HC	Total headcount of fulltime R&D personnel and researchers.
RDP15	rd_p_persreg_PROF_POS_TOTAL__SEX_T__SECTPERF_TOTAL__UNIT_PC_EMP_HC	Total headcount of fulltime R&D personnel and researchers. Normalized by total employment.
GRC	GRID_COUNT	Count of research institutes in the region.
GDT1	GDELT_TONE_COMPETITIVE_INDUSTRIES	Average tone of the media articles, queried in the GDELT database matching the 'COMPETITIVE INDUSTRIES' keywords and NUTS2 region.
GDT2	GDELT_TONE_EDUCATION_SKILLS_DEVELOPMENT_AND_LABOR_MARKET	Average tone of the media articles, queried in the GDELT database matching the 'EDUCATION SKILLS DEVELOPMENT' and 'LABOR MARKET' keywords and NUTS2 region.
GDT3	GDELT_TONE_EMPLOYABILITY_SKILLS_AND_JOBS	Average tone of the media articles, queried in the GDELT database matching the 'EMPLOYABILITY SKILLS AND JOBS' keyword and NUTS2 region.
GDT4	GDELT_TONE_INDUSTRY_POLICY	Average tone of the media articles queried in the GDELT database matching the 'INDUSTRY POLICY' keyword and NUTS2 region.
GDT5	GDELT_TONE_JOBS	Average tone of the media articles queried in the GDELT database matching the 'JOBS' keyword and NUTS2 region.
GDT6	GDELT_TONE_MANUFACTURING	Average tone of the media articles queried in the GDELT database matching the 'MANUFACTURING' keyword and NUTS2 region.
GDC1	GDELT_COUNT_COMPETITIVE_INDUSTRIES	Count of the media articles, queried in the GDELT database matching the 'COMPETITIVE INDUSTRIES' keyword and NUTS2 region.
GDC2	GDELT_COUNT_EDUCATION_SKILLS_DEVELOPMENT_AND_LABOR_MARKET	Count of the media articles, queried in the GDELT database matching the 'EDUCATION SKILLS DEVELOPMENT', 'LABOR MARKET' keywords and NUTS2 region.
GDC3	GDELT_COUNT_EMPLOYABILITY_SKILLS_AND_JOBS	Count of the media articles, queried in the GDELT database matching the 'EMPLOYABILITY SKILLS AND JOBS' keywords and NUTS2 region.
GDC4	GDELT_COUNT_INDUSTRY_POLICY	Count of the media articles, queried in the GDELT database matching the 'INDUSTRY POLICY' keywords and NUTS2 region.
GDC5	GDELT_COUNT_JOBS	Count of the media articles, queried in the GDELT database matching the 'JOBS' keyword and NUTS2 region.
GDC6	GDELT_COUNT_MANUFACTURING	Count of the media articles, queried in the GDELT database matching the 'MANUFACTURING' keyword and NUTS2 region.
